# Supplementary material
Source: Springer Nature journal article supplement (https://www.springermedizin.de/resource/supplementary/13012_2009_220_MOESM1_ESM.pdf/9629608)
Supplement: MOESM1 [file 9629608]

*Clinician-related strategy*

*Patient-related strategy*

Patient with CRC < 70 years

Calculation of familial CRC risk

*Website with information and risk assessment tool*

*Website with information and risk assessment tool*

Interpretation of familial CRC risk

*Guideline dissemination*

*Education*

Communication of familial CRC risk

*Risk communication tool*

Average familial CRC risk (< 10%)

Moderate familial CRC risk (10-15%)

High familial CRC risk (> 15%)

Referral for surveillance

Referral for genetic counselling

*Decision aid "Genetic counselling"*

*Decision aid "Surveillance"*

Decline

Accept

Decline

Accept

Regular follow-up

Surveillance by colonoscopy

Genetic counselling
